# Supplementary figures and images for: Metadherin Regulates Inflammatory Breast Cancer Invasion and Metastasis
Source: MDPI journal article supplement (doi:10.3390/ijms24054694), 2023-02-28

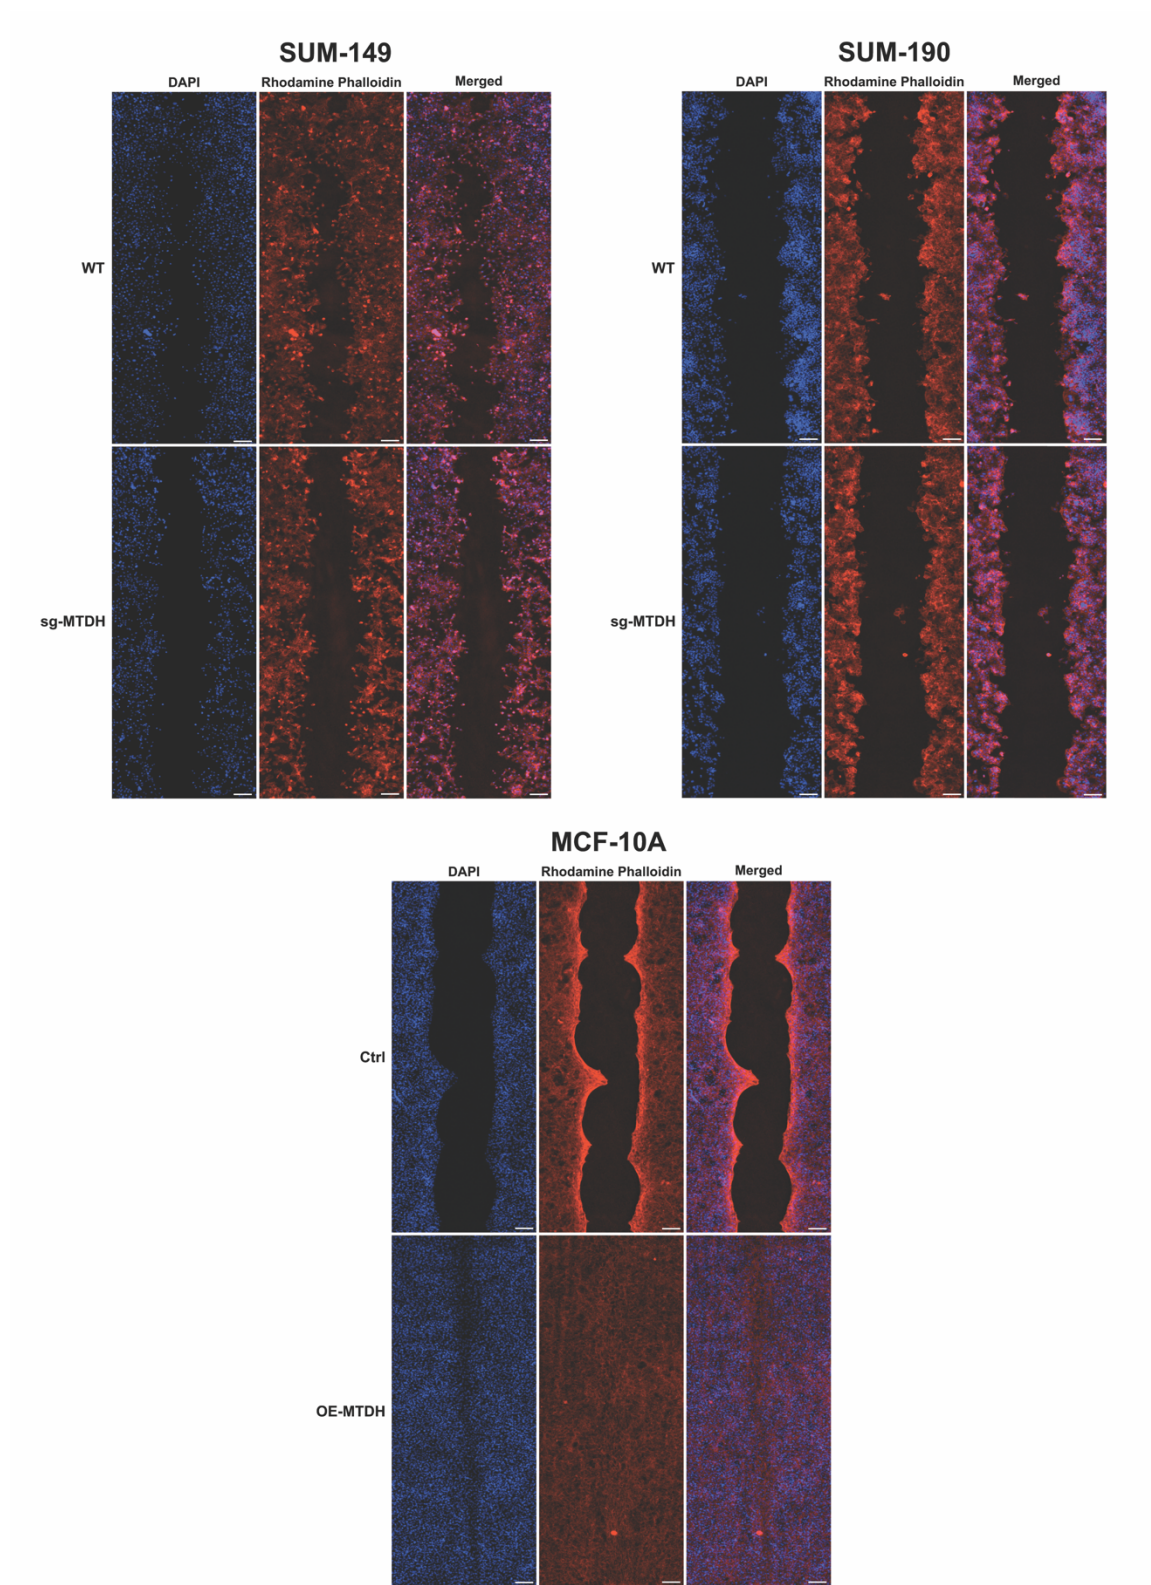

**Figure S1:** Wound healing assay micrographs at a magnification of 4X. Scale bar = 50 μm.

Supplement: s1 [file s1]
